# Supplementary material for: Measures of Thyroid Function among Belarusian Children and Adolescents Exposed to Iodine-131 from the Accident at the Chernobyl Nuclear Plant
Source: PubMed Central journal article supplement (PMC3701991; doi:10.1289/ehp.1205783), 2013-05-07
Supplement: ehp.1205783.s001.pdf [file ehp.1205783.s001.pdf]

## SUPPLEMENTAL MATERIAL

### Measures of Thyroid Function among Belarusian Children and Adolescents Exposed to Iodine-131 from the Accident at the Chernobyl Nuclear Plant

Evgenia Ostroumova, Alexander Rozhko, Maureen Hatch, Kyoji Furukawa, Olga Polyanskaya, Robert J. McConnell, Eldar Nadyrov, Sergey Petrenko, George Romanov, Vasilina Yauseyenka, Vladimir Drozdovitch, Viktor Minenko, Alexander Prokopovich, Irina Savasteeva, Lydia B. Zablotska, Kiyohiko Mabuchi, and Alina V. Brenner

#### Table of Contents

|                                                                                                                                                                                                                                          |            |
|------------------------------------------------------------------------------------------------------------------------------------------------------------------------------------------------------------------------------------------|------------|
| <b>Supplemental Material, Table S1.</b> ORs and 95% CIs for selected risk factors associated with background prevalence of thyroid functional outcomes among individuals exposed to <sup>131</sup> I due to the Chernobyl accident ..... | <b>2-4</b> |
| <b>Supplemental Material, Table S2.</b> ORs of prevalence of thyroid functional outcomes by sex and age at examination among individuals exposed to <sup>131</sup> I due to the Chernobyl accident .....                                 | <b>5</b>   |

**Supplemental Material, Table S1.** ORs and 95% CIs for selected risk factors associated with background prevalence of thyroid functional outcomes among individuals exposed to <sup>131</sup>I due to the Chernobyl accident

| Characteristics              | Hypothyroidism          |                          | Hyperthyroidism   |                          | Elevated ATPO      |                          | AIT               |                          |                    |
|------------------------------|-------------------------|--------------------------|-------------------|--------------------------|--------------------|--------------------------|-------------------|--------------------------|--------------------|
|                              | Cases (%)               | OR <sup>a</sup> (95% CI) | Cases (%)         | OR <sup>a</sup> (95% CI) | Cases (%)          | OR <sup>a</sup> (95% CI) | Cases (%)         | OR <sup>a</sup> (95% CI) |                    |
| Gender                       |                         |                          |                   |                          |                    |                          |                   |                          |                    |
|                              | Male                    | 137 (2.5)                | 1.00 (Referent)   | 49 (0.9)                 | 1.00 (Referent)    | 198 (3.7)                | 1.00 (Referent)   | 12 (0.2)                 | 1.00 (Referent)    |
|                              | Female                  | 182 (3.3)                | 1.02 (0.79, 1.31) | 88 (1.6)                 | 1.56 (1.05, 2.34)  | 424 (7.8)                | 1.96 (1.62, 2.37) | 75 (1.4)                 | 5.13 (2.74, 10.41) |
|                              | p-Value <sup>b</sup>    |                          | 0.88              |                          | 0.03               |                          | <0.001            |                          | < 0.001            |
| Place of residency           |                         |                          |                   |                          |                    |                          |                   |                          |                    |
|                              | Gomel Oblast            | 216 (3.3)                | 1.52 (1.11, 2.10) | 85 (1.3)                 | 0.81 (0.53, 1.28)  | 367 (5.6)                | 0.99 (0.81, 1.22) | 59 (0.9)                 | 1.43 (0.83, 2.56)  |
|                              | Minsk Oblast & city     | 60 (1.9)                 | 1.00 (Referent)   | 36 (1.2)                 | 1.00 (Referent)    | 175 (5.6)                | 1.00 (Referent)   | 20 (0.6)                 | 1.00 (Referent)    |
|                              | Mogilev & other oblasts | 43 (3.6)                 | 1.58 (1.02, 2.41) | 16 (1.3)                 | 1.00 (0.51, 1.86)  | 80 (6.6)                 | 1.06 (0.79, 1.42) | 8 (0.7)                  | 0.91 (0.36, 2.12)  |
|                              | p-Value <sup>b</sup>    |                          | 0.02              |                          | 0.58               |                          | 0.89              |                          | 0.27               |
| Residence                    |                         |                          |                   |                          |                    |                          |                   |                          |                    |
|                              | Rural                   | 161 (3.8)                | 1.23 (0.96, 1.57) | 65 (1.5)                 | 1.72 (1.18, 2.52)  | 214 (5.0)                | 0.80 (0.66, 0.96) | 29 (0.7)                 | 0.70 (0.42, 1.14)  |
|                              | Urban                   | 158 (2.4)                | 1.00 (Referent)   | 72 (1.1)                 | 1.00 (Referent)    | 408 (6.2)                | 1.00 (Referent)   | 58 (0.9)                 | 1.00 (Referent)    |
|                              | p-Value <sup>b</sup>    |                          | 0.10              |                          | 0.005              |                          | 0.02              |                          | 0.15               |
| Current smoking              |                         |                          |                   |                          |                    |                          |                   |                          |                    |
|                              | No                      | 269 (3.6)                | 1.00 (Referent)   | 97 (1.3)                 | 1.00 (Referent)    | 479 (6.4)                | 1.00 (Referent)   | 71 (0.9)                 | 1.00 (Referent)    |
|                              | Yes                     | 49 (1.5)                 | 0.54 (0.38, 0.75) | 38 (1.1)                 | 0.95 (0.62, 1.45)  | 141 (4.3)                | 0.82 (0.66, 1.02) | 15 (0.4)                 | 0.86 (0.45, 1.55)  |
|                              | p-Value <sup>b</sup>    |                          | <0.001            |                          | 0.83               |                          | 0.07              |                          | 0.64               |
|                              | Unknown                 | 1 (2.6)                  | 0.85 (0.05, 4.52) | 2 (5.1)                  | 2.29 (0.32, 10.00) | 2 (5.1)                  | 1.01 (0.15, 3.73) | 1 (2.6)                  | 9.03 (0.43, 63.84) |
| Vitamin consumption          |                         |                          |                   |                          |                    |                          |                   |                          |                    |
|                              | No                      | 299 (3.0)                | 1.00 (Referent)   | 124 (1.2)                | 1.00 (Referent)    | 574 (5.8)                | 1.00 (Referent)   | 81 (0.8)                 | 1.00 (Referent)    |
|                              | Yes                     | 7 (2.3)                  | 0.81 (0.34, 1.64) | 1 (0.3)                  | 0.27 (0.01, 1.23)  | 18 (5.9)                 | 1.08 (0.63, 1.73) | 2 (0.3)                  | 0.83 (0.13, 2.80)  |
|                              | p-Value <sup>b</sup>    |                          | 0.59              |                          | 0.10               |                          | 0.77              |                          | 0.79               |
|                              | Unknown                 | 13 (2.1)                 | 0.68 (0.36, 1.15) | 12 (1.9)                 | 1.69 (0.86, 3.02)  | 30 (4.8)                 | 0.78 (0.52, 1.12) | 4 (0.6)                  | 0.67 (0.20, 1.65)  |
| Thyroid disease in relatives |                         |                          |                   |                          |                    |                          |                   |                          |                    |
|                              | No                      | 288 (2.9)                | 1.00 (Referent)   | 120 (1.2)                | 1.00 (Referent)    | 553 (5.7)                | 1.00 (Referent)   | 76 (0.8)                 | 1.00 (Referent)    |
|                              | ≥1 relative affected    | 22 (2.5)                 | 0.72 (0.45, 1.11) | 12 (1.3)                 | 1.17 (0.60, 2.07)  | 60 (6.8)                 | 1.13 (0.84, 1.48) | 10 (1.1)                 | 1.29 (0.57, 2.34)  |

| Characteristics       | Hypothyroidism |                          | Hyperthyroidism |                          | Elevated ATPO |                          | AIT       |                          |  |
|-----------------------|----------------|--------------------------|-----------------|--------------------------|---------------|--------------------------|-----------|--------------------------|--|
|                       | Cases (%)      | OR <sup>a</sup> (95% CI) | Cases (%)       | OR <sup>a</sup> (95% CI) | Cases (%)     | OR <sup>a</sup> (95% CI) | Cases (%) | OR <sup>a</sup> (95% CI) |  |
|                       |                | 0.14                     |                 | 0.62                     |               | 0.40                     |           | 0.61                     |  |
| p-Value <sup>b</sup>  |                |                          |                 |                          |               |                          |           |                          |  |
| Unknown               | 9 (5.3)        | 1.68 (0.75, 3.31)        | 5 (3.0)         | 1.92 (0.60, 4.81)        | 9 (5.3)       | 0.84 (0.39, 1.58)        | 1 (0.6)   | 0.37 (0.02, 2.09)        |  |
| Year of exam          |                |                          |                 |                          |               |                          |           |                          |  |
| 1996 - 98             | 119 (4.0)      | 1.00 (Referent)          | 17 (0.6)        | 1.00 (Referent)          | 117 (3.9)     | 1.00 (Referent)          | 22 (0.7)  | 1.00 (Referent)          |  |
| 1999                  | 57 (2.5)       | 0.70 (0.49, 0.98)        | 44 (1.9)        | 2.75 (1.56, 5.06)        | 195 (8.6)     | 2.30 (1.79, 2.96)        | 18 (0.8)  | 1.04 (0.54, 2.05)        |  |
| 2000 – 03             | 143 (2.6)      | 1.08 (0.79, 1.47)        | 76 (1.4)        | 1.72 (1.00, 3.11)        | 310 (5.5)     | 1.32 (1.04, 1.69)        | 47 (0.8)  | 1.34 (0.77, 2.37)        |  |
| p-Value <sup>b</sup>  |                | 0.02                     |                 | 0.002                    |               | <0.001                   |           | 0.57                     |  |
| Season of exam        |                |                          |                 |                          |               |                          |           |                          |  |
| Dec – Feb             | 66 (2.7)       | 1.00 (Referent)          | 36 (1.5)        | 1.00 (Referent)          | 75 (3.1)      | 1.00 (Referent)          | 11 (0.4)  | 1.00 (Referent)          |  |
| March – May           | 111 (2.5)      | 1.06 (0.77, 1.47)        | 59 (1.3)        | 0.75 (0.49, 1.17)        | 268 (6.0)     | 1.83 (1.41, 2.40)        | 38 (0.9)  | 1.71 (0.89, 3.59)        |  |
| June – Aug            | 53 (3.2)       | 1.05 (0.71, 1.53)        | 15 (0.9)        | 0.48 (0.25, 0.89)        | 127 (7.8)     | 2.35 (1.75, 3.19)        | 16 (1.0)  | 1.22 (0.55, 2.78)        |  |
| Sept – Nov            | 89 (3.8)       | 1.40 (1.01, 1.97)        | 27 (1.2)        | 0.73 (0.43, 1.23)        | 152 (6.5)     | 2.05 (1.54, 2.74)        | 22 (0.9)  | 2.03 (0.99, 4.44)        |  |
| p-Value <sup>b</sup>  |                | 0.16                     |                 | 0.14                     |               | <0.001                   |           | 0.18                     |  |
| ATPO level, U/mL      |                |                          |                 |                          |               |                          |           |                          |  |
| ≤ 60                  | 257 (2.5)      | 1.00 (Referent)          | 111 (1.1)       | 1.00 (Referent)          | 0             | n/a                      | 6         | n/a                      |  |
| > 60                  | 62 (10.0)      | 3.58 (2.49, 5.08)        | 26 (4.2)        | 2.75 (1.60, 4.55)        | 622           | n/a                      | 81        | n/a                      |  |
| p-Value <sup>b</sup>  |                | <0.001                   |                 | < 0.001                  |               |                          |           |                          |  |
| ATG level, U/mL       |                |                          |                 |                          |               |                          |           |                          |  |
| ≤ 60                  | 273            | 1.00 (Referent)          | 118             | 1.00 (Referent)          | 400           | n/a                      | 11        | n/a                      |  |
| > 60                  | 46             | 2.22 (1.47, 3.30)        | 19              | 1.51 (0.82, 2.68)        | 222           | n/a                      | 76        | n/a                      |  |
| p-Value <sup>b</sup>  |                | < 0.001                  |                 | 0.18                     |               |                          |           |                          |  |
| Urinary iodine, µg/ L |                |                          |                 |                          |               |                          |           |                          |  |
| < 20                  | 58 (4.8)       | 1.51 (1.06, 2.16)        | 9 (0.7)         | 0.59 (0.26, 1.21)        | 80 (6.6)      | 1.30 (0.97, 1.72)        | 15 (1.2)  | 1.51 (0.75, 2.96)        |  |
| 20 – 49               | 88 (3.1)       | 1.03 (0.75, 1.40)        | 18 (0.6)        | 0.57 (0.31, 1.01)        | 159 (5.6)     | 1.05 (0.83, 1.32)        | 14 (0.5)  | 0.64 (0.32, 1.24)        |  |
| 50 – 99               | 85 (2.8)       | 1.00 (Referent)          | 32 (1.0)        | 1.00 (Referent)          | 168 (5.5)     | 1.00 (Referent)          | 24 (0.8)  | 1.00 (Referent)          |  |
| ≥100                  | 86 (2.4)       | 0.91 (0.67, 1.24)        | 75 (2.1)        | 2.10 (1.39, 3.25)        | 206 (5.7)     | 1.04 (0.84, 1.28)        | 33 (0.9)  | 1.18 (0.69, 2.05)        |  |
| p-Value <sup>b</sup>  |                | 0.05                     |                 | <0.001                   |               | 0.35                     |           | 0.11                     |  |
| Missing/ Unknown      | 2 (1.6)        | 0.54 (0.09, 1.78)        | 3 (2.4)         | 2.02 (0.47, 5.93)        | 9 (7.3)       | 0.99 (0.45, 1.95)        | 1 (0.8)   | 0.82 (0.04, 4.13)        |  |
| Presence of goiter    |                |                          |                 |                          |               |                          |           |                          |  |
| No                    | 245 (2.6)      | 1.00 (Referent)          | 110 (1.2)       | 1.00 (Referent)          | 483 (5.2)     | 1.00 (Referent)          | 42 (0.45) | 1.00 (Referent)          |  |
| Yes                   | 73 (4.8)       | 1.39 (1.04, 1.85)        | 26 (1.7)        | 1.64 (1.02, 2.57)        | 137 (8.9)     | 1.77 (1.43, 2.18)        | 45 (2.9)  | 7.50 (4.74, 11.90)       |  |

| Characteristics  | Hypothyroidism |                          | Hyperthyroidism |                          | Elevated ATPO |                          | AIT       |                          |
|------------------|----------------|--------------------------|-----------------|--------------------------|---------------|--------------------------|-----------|--------------------------|
|                  | Cases (%)      | OR <sup>a</sup> (95% CI) | Cases (%)       | OR <sup>a</sup> (95% CI) | Cases (%)     | OR <sup>a</sup> (95% CI) | Cases (%) | OR <sup>a</sup> (95% CI) |
|                  |                | 0.03                     |                 | 0.04                     |               | < 0.001                  |           | < 0.001                  |
| Unknown/ Missing | 1 (3.8)        | 1.41 (0.08, 7.01)        | 1 (3.8)         | 2.46 (0.13, 12.86)       | 2 (7.7)       | 1.62 (0.26, 5.63)        | 0 (0.0)   | 0.0                      |

Abbreviations: ATG, antibodies to thyroglobulin; ATPO, autoantibodies to thyroperoxidase; AIT, autoimmune thyroiditis; CI, confidence interval; OR, odds ratio; CI, confidence interval; n/a, not applicable.

<sup>a</sup>All analyses performed with adjustment for sex, sex and age at examination interaction, oblast of residency at examination, urban or rural residency, current smoking, vitamin consumption, family history of thyroid disease, year and season of examination, ATPO and ATG levels (except for elevated ATPO and AIT), urinary iodine levels, presence of goiter and <sup>131</sup>I thyroid dose based on a linear excess odds ratio model.

<sup>b</sup>*p*-Value for homogeneity.

**Supplemental Material, Table S2.** ORs of prevalence of thyroid functional outcomes by sex and age at examination among individuals exposed to <sup>131</sup>I due to the Chernobyl accident

| Age at examination, years | Hypothyroidism |                   | Hyperthyroidism |                     | Cases (%)  | Elevated ATPO     |             | Cases (%)          | AIT |  |
|---------------------------|----------------|-------------------|-----------------|---------------------|------------|-------------------|-------------|--------------------|-----|--|
|                           | Cases (%)      | OR (95% CI)       | Cases (%)       | OR (95% CI)         |            | OR (95% CI)       | OR (95% CI) |                    |     |  |
| <b>Men</b>                |                |                   |                 |                     |            |                   |             |                    |     |  |
| 11–14                     | 45 (32.8)      | 1.00 (Referent)   | 1 (2.0)         | 1.00 (Referent)     | 21 (10.6)  | 1.00 (Referent)   | 1 (8.3)     | 1.00 (Referent)    |     |  |
| 15–19                     | 56 (40.9)      | 0.65 (0.42, 1.00) | 8 (16.3)        | 2.71 (0.49, 50.62)  | 53 (26.8)  | 0.96 (0.57, 1.65) | 2 (16.7)    | 1.13 (0.11, 24.49) |     |  |
| 20–24                     | 16 (11.7)      | 0.22 (0.12, 0.40) | 16 (32.7)       | 5.57 (1.11, 101.10) | 54 (27.3)  | 1.13 (0.67, 1.96) | 4 (33.3)    | 2.73 (0.39, 53.91) |     |  |
| 25–33                     | 20 (14.6)      | 0.24 (0.13, 0.43) | 24 (49.0)       | 7.05 (1.45, 127.00) | 70 (35.3)  | 1.36 (0.82, 2.35) | 5 (41.7)    | 3.64 (0.57, 70.56) |     |  |
| p-Value for trend, df = 1 | <0.001         |                   | 0.002           |                     | 0.07       |                   | 0.09        |                    |     |  |
| <b>Women</b>              |                |                   |                 |                     |            |                   |             |                    |     |  |
| 11–14                     | 44 (24.2)      | 1.00 (Referent)   | 2 (2.3)         | 1.00 (Referent)     | 27 (6.4)   | 1.00 (Referent)   | 3 (4.0)     | 1.00 (Referent)    |     |  |
| 15–19                     | 35 (19.2)      | 0.32 (0.20, 0.51) | 18 (20.4)       | 2.73 (0.77, 17.32)  | 91 (21.5)  | 1.18 (0.76, 1.88) | 13 (17.3)   | 2.05 (0.65-9.05)   |     |  |
| 20–24                     | 49 (26.9)      | 0.44 (0.28, 0.70) | 30 (34.1)       | 4.32 (1.28, 26.97)  | 126 (29.7) | 1.65 (1.08, 2.61) | 19 (25.3)   | 3.32 (1.10-14.38)  |     |  |
| 25–33                     | 54 (29.7)      | 0.41 (0.26, 0.65) | 38 (43.2)       | 4.89 (1.45, 30.46)  | 180 (42.4) | 2.39 (1.57, 3.75) | 40 (53.3)   | 7.48 (2.61-31.68)  |     |  |
| p-Value for trend, df = 1 | 0.02           |                   | 0.004           |                     | < 0.001    |                   | < 0.001     |                    |     |  |

Abbreviations: CI, confidence interval; OR, odds ratio; ATPO, autoantibodies to thyroperoxidase; AIT, autoimmune thyroiditis.

All analyses performed with adjustment for sex, oblast of residency at examination, urban or rural residency, current smoking, vitamin consumption, family history of thyroid disease, year and season of examination, ATPO and ATG levels (except for elevated ATPO and AIT), urinary iodine levels, presence of goiter and <sup>131</sup>I thyroid dose based on a linear excess odds ratio model.
